# Supplementary material for: A 12-Week, Single-Centre, Randomised, Double-Blind, Placebo-Controlled, Parallel-Design Clinical Trial for the Evaluation of the Efficacy and Safety of Lactiplantibacillus plantarum SKO-001 in Reducing Body Fat
Source: MDPI journal article supplement (doi:10.3390/nu16081137), 2024-04-11
Supplement: s1 [file s1]

## Supplementary Materials

**Title: A 12-Week, Single-Centre, Randomised, Double-Blind, Placebo-Controlled, Parallel Design Clinical Trial for the Evaluation of the Efficacy and Safety of *Lactiplantibacillus plantarum* SKO-001 on Reducing Body Fat**

**Seon Mi Shin, Jeong Su Park, Sang Back Kim, Young Hee Cho, Hee Seo, Hak Sung Lee**

**Table S1.** Raw materials and mixing ratio of the study intervention

| Interventional formulation | Raw material                                  | Mixing ratio (%) | Content (mg) |
|----------------------------|-----------------------------------------------|------------------|--------------|
| SKO-001                    | <i>Lactiplantibacillus plantarum</i> SKO-001* | 80.0             | 360.00       |
|                            | Maltodextrin                                  | 17.0             | 76.50        |
|                            | Magnesium stearate                            | 1.00             | 4.50         |
|                            | Silicon dioxide                               | 2.00             | 9.00         |
|                            | Total                                         | 100.00           | 450.00       |
| Placebo                    | Gardenia Yellow                               | 0.4              | 1.8          |
|                            | Maltodextrin                                  | 96.60            | 436.70       |
|                            | Magnesium stearate                            | 1.00             | 4.50         |
|                            | Silicon dioxide                               | 2.00             | 9.00         |
|                            | Total                                         | 100.00           | 450.00       |

\* *Lactiplantibacillus plantarum* SKO-001 contains  $2 \times 10^{10}$  CFU of *L. plantarum* SKO-001 per 1 g of corn starch.

**Table S2.** Endpoint results at 12 weeks from baseline according to the groups.

|                                      |                 | SKO-001 group<br>(N = 45) | Placebo group (N = 47) |
|--------------------------------------|-----------------|---------------------------|------------------------|
| Body fat percentage (%)              | V2              | 38.98 ± 5.19              | 39.49 ± 5.01           |
|                                      | V5              | 38.79 ± 5.18              | 39.97 ± 5.19           |
|                                      | V5-V2           | -0.19 ± 1.36              | 0.48 ± 1.23            |
|                                      | <i>p</i> -value | 0.357                     | <b>0.011*</b>          |
|                                      | <i>p</i> -value | <b>#0.016*</b>            |                        |
| Body fat mass, g                     | V2              | 26,631.58 ± 4,216.42      | 27,102.13 ± 3,632.25   |
|                                      | V5              | 26,462.07 ± 4,242.20      | 27,452.51 ± 3,924.90   |
|                                      | V5-V2           | -169.51 ± 1,168.26        | 350.38 ± 1,216.37      |
|                                      | <i>p</i> -value | ^0.336 <sup>1</sup>       | <b>†0.022*</b>         |
|                                      | <i>p</i> -value | <b>\$0.020*</b>           |                        |
| Fat-free mass, g                     | V2              | 44,277.53 ± 7,527.85      | 44,279.30 ± 7,763.1    |
|                                      | V5              | 44,320.60 ± 7,449.52      | 44,018.60 ± 8,184.36   |
|                                      | V5-V2           | 43.07 ± 1,197.40          | -260.70 ± 1,233.18     |
|                                      | <i>p</i> -value | †0.631                    | ^0.154                 |
|                                      | <i>p</i> -value | 0.175                     |                        |
| Body fat percentage (%)<br>(Trunk)   | V2              | 42.46 ± 5.61              | 42.90 ± 4.83           |
|                                      | V5              | 42.23 ± 5.51              | 43.73 ± 4.99           |
|                                      | V5-V2           | -0.23 ± 1.80              | 0.83 ± 1.78            |
|                                      | <i>p</i> -value | †0.388                    | ^0.002***              |
|                                      | <i>p</i> -value | <b>0.005***</b>           |                        |
| Body fat percentage (%)<br>(Android) | V2              | 44.98 ± 6.51              | 45.68 ± 5.26           |
|                                      | V5              | 44.66 ± 6.77              | 46.59 ± 5.30           |
|                                      | V5-V2           | -0.33 ± 2.35              | 0.91 ± 2.14            |

|                             |                 |                      |                      |
|-----------------------------|-----------------|----------------------|----------------------|
| Body fat mass, g<br>(Trunk) | <i>p</i> -value | †0.356               | ^0.005**             |
|                             | <i>p</i> -value |                      | 0.010***             |
|                             | V2              | 15,115.67 ± 2,860.99 | 15,232.47 ± 2,197.87 |
|                             | V5              | 14,997.44 ± 2,814.50 | 15,533.26 ± 2,329.50 |
|                             | V5-V2           | -118.22 ± 805.98     | 300.79 ± 851.86      |
|                             | <i>p</i> -value | †0.331               | 0.019*               |
|                             | <i>p</i> -value |                      | 0.017*               |

SKO-001: *Lactiplantibacillus plantarum* SKO-001-based interventional formulation; V, visit; \* $p < 0.05$ , \*\* $p < 0.01$ , \*\*\* $p < 0.001$ . #: Independent *t*-test \$: Wilcoxon rank sum test, ^: Paired *t*-test, †: Wilcoxon signed-rank test.

**Table S3.** Endpoint results at 12 weeks from baseline according to the groups .

| Parameter                | Treatment | Baseline      | 4 weeks       | 8 weeks       | 12 weeks      | <i>p</i> -value | <i>p</i> -value |
|--------------------------|-----------|---------------|---------------|---------------|---------------|-----------------|-----------------|
| Weight (kg)              | SKO-001   | 71.27 ± 8.55  | 71.43 ± 8.58  | 71.28 ± 8.48  | 71.13 ± 8.53  | 0.535           | 0.726           |
|                          | Placebo   | 71.72 ± 8.02  | 72.09 ± 8.26  | 72.06 ± 8.55  | 71.70 ± 8.81  | 0.949           |                 |
|                          | p-value   | 0.796         | 0.708         | 0.665         | 0.758         |                 |                 |
| BMI (kg/m <sup>2</sup> ) | SKO-001   | 27.27 ± 1.48  | 27.34 ± 1.59  | 27.29 ± 1.52  | 27.24 ± 1.63  | 0.64            | 0.888           |
|                          | Placebo   | 27.50 ± 1.41  | 27.64 ± 1.49  | 27.61 ± 1.61  | 27.48 ± 1.73  | 0.835           |                 |
|                          | p-value   | 0.467         | 0.356         | 0.331         | 0.494         |                 |                 |
| Waist circumference (cm) | SKO-001   | 92.09 ± 5.49  | 92.10 ± 5.38  | 91.82 ± 5.28  | 91.79 ± 5.50  | 0.582           | 0.809           |
|                          | Placebo   | 92.65 ± 5.07  | 92.85 ± 4.52  | 93.00 ± 4.95  | 92.67 ± 4.88  | 0.969           |                 |
|                          | p-value   | 0.69          | 0.476         | 0.271         | 0.421         |                 |                 |
| Hip circumference (cm)   | SKO-001   | 101.85 ± 4.19 | 101.43 ± 4.18 | 101.50 ± 4.24 | 101.27 ± 4.20 | 0.064           | 0.836           |
|                          | Placebo   | 102.58 ± 3.75 | 102.57 ± 3.64 | 102.47 ± 3.64 | 102.17 ± 3.70 | 0.08            |                 |
|                          | p-value   | 0.382         | 0.169         | 0.21          | 0.282         |                 |                 |
| WHR                      | SKO-001   | 0.90 ± 0.05   | 0.91 ± 0.05   | 0.90 ± 0.05   | 0.90 ± 0.05   | 0.299           | 0.32            |
|                          | Placebo   | 0.91 ± 0.05   | 0.91 ± 0.05   | 0.91 ± 0.04   | 0.91 ± 0.05   | 0.79            |                 |
|                          | p-value   | 0.845         | 0.979         | 0.122         | 0.289         |                 |                 |

SKO-001: *Lactiplantibacillus plantarum* SKO-001-based interventional formulation; BMI, body mass index; WHR, waist/hip ratio.

Table S4. Calorie intake

| Parameter             | Treatment | Baseline          | 12 weeks         | <i>p</i> -value | <i>p</i> -value |
|-----------------------|-----------|-------------------|------------------|-----------------|-----------------|
| Calorie intake (Kcal) | SKO-001   | 1,719.80 ± 562.47 | 1565.48 ± 615.87 | †0.121          | 0.754           |
|                       | Placebo   | 1,617.66 ± 489.86 | 1476.92 ± 456.85 | ^0.104          |                 |
|                       | p-value   | 0.278             | 0.740            |                 |                 |

SKO-001: Lactiplantibacillus plantarum SKO-001-based interventional formulation. \$: Wilcoxon's rank sum test ^: Paired t-test †: Wilcoxon's signed-rank test

**Table S5. Analysis of participants with calorie intake exceeding 1500 kcal (as of visit 2, baseline)**

| Parameters              | Treatment       | Baseline             | 12 weeks             | <i>p</i> -value | <i>p</i> -value |
|-------------------------|-----------------|----------------------|----------------------|-----------------|-----------------|
| Body fat percentage (%) | SKO-001         | 39.20 ± 4.91         | 38.95 ± 5.11         | ^0.385          | #0.030*         |
|                         | Placebo         | 38.40 ± 5.43         | 38.97 ± 5.66         | ^0.021*         |                 |
|                         | <i>p</i> -value | \$0.710              | \$0.883              |                 |                 |
| Body fat mass (g)       | SKO-001         | 27,837.63 ± 4,242.20 | 27,530.74 ± 4,302.76 | †0.645          | \$0.004**       |
|                         | Placebo         | 27,095.44 ± 3,736.10 | 27,616.70 ± 4,007.39 | ^0.025*         |                 |
|                         | <i>p</i> -value | #0.498               | #0.940               |                 |                 |
| LDL-C (mg/dL)           | SKO-001         | 137.48 ± 28.33       | 127.78 ± 30.23       | 0.016*          | #0.012*         |
|                         | Placebo         | 121.33 ± 33.93       | 126.33 ± 36.63       | 0.241           |                 |
|                         | <i>p</i> -value | \$0.059              | #0.875               |                 |                 |
| Adiponectin (ng/mL)     | SKO-001         | 10,040.28 ± 6240.01  | 10,966.44 ± 7,390.67 | †0.111          | \$0.004**       |
|                         | Placebo         | 9,908.54 ± 3641.65   | 9,083.96 ± 3,717.60  | ^0.044*         |                 |
|                         | <i>p</i> -value | \$0.400              | \$0.918              |                 |                 |

SKO-001: *Lactiplantibacillus plantarum* SKO-001-based interventional formulation; LDL-C, low-density lipoprotein-cholesterol

\**p* < 0.05, \*\**p* < 0.01

#: Independent-samples *t*-test

\$. Wilcoxon rank sum test

^: Paired *t*-test

†: Wilcoxon signed-rank test

Number of participants in each group:: SKO 27, Placebo 27

**Table S6. Stratification analysis of participants with calorie intake exceeding 1500 kcal (based on average of visits 2 and 5)**

| Parameters                           | Treatment       | Baseline             | 12 weeks             | <i>p</i> -value | <i>p</i> -value |
|--------------------------------------|-----------------|----------------------|----------------------|-----------------|-----------------|
| Body fat percentage (%)              | SKO-001         | 38.22 ± 5.73         | 37.88 ± 5.64         | 0.227           | #0.017*         |
|                                      | Placebo         | 38.55 ± 5.74         | 39.13 ± 5.98         | <b>0.030*</b>   |                 |
|                                      | <i>p</i> -value | \$0.624              | \$0.289              |                 |                 |
| Body fat mass (g)                    | SKO-001         | 27,056.36 ± 4,191.11 | 26,581.48 ± 3,995.47 | 0.078           | #0.007**        |
|                                      | Placebo         | 27,325.04 ± 3,854.69 | 27,856.58 ± 4,156.20 | <b>0.039*</b>   |                 |
|                                      | <i>p</i> -value | #0.816               | #0.280               |                 |                 |
| Body weight (kg)                     | SKO-001         | 74.03 ± 8.89         | 73.42 ± 8.94         | <b>0.034*</b>   | <b>0.023*</b>   |
|                                      | Placebo         | 74.17 ± 7.84         | 74.53 ± 8.48         | 0.266           |                 |
|                                      | <i>p</i> -value | 0.951                | 0.658                |                 |                 |
| Body mass index (kg/m <sup>2</sup> ) | SKO-001         | 27.48 ± 1.45         | 27.26 ± 1.54         | †0.122          | <b>\$0.035*</b> |
|                                      | Placebo         | 27.58 ± 1.33         | 27.69 ± 1.50         | ^0.353          |                 |
|                                      | <i>p</i> -value | #0.803               | #0.328               |                 |                 |
| LDL-C (mg/dL)                        | SKO-001         | 135.84 ± 30.19       | 128.64 ± 30.98       | 0.074           | #0.038*         |
|                                      | Placebo         | 123.75 ± 30.42       | 129.25 ± 32.76       | 0.237           |                 |
|                                      | <i>p</i> -value | \$0.158              | #0.947               |                 |                 |
| Adiponectin (ng/mL)                  | SKO-001         | 10,472.46 ± 5939.50  | 11,229.60 ± 6,580.48 | 0.092           | #0.005**        |
|                                      | Placebo         | 9,545.21 ± 3544.99   | 8,713.62 ± 3,399.07  | <b>0.014*</b>   |                 |
|                                      | <i>p</i> -value | \$0.992              | 4.399                |                 |                 |

SKO-001: *Lactiplantibacillus plantarum* SKO-001-based interventional formulation; LDL-C, low-density lipoprotein-cholesterol

\**p* < 0.05, \*\**p* < 0.01

#: Independent-samples *t*-test

\$: Wilcoxon rank sum test

^: Paired *t*-test

†: Wilcoxon signed-rank test

Number of participants in each group: SKO 25, Placebo 24

**Table S7.** Stratification analysis of participants with physical activity of <3000 METs/w at visit 2 (baseline)

| Parameters              | Treatment       | Baseline             | 12 weeks             | <i>p</i> -value | <i>p</i> -value |
|-------------------------|-----------------|----------------------|----------------------|-----------------|-----------------|
| Body fat percentage (%) | SKO-001         | 38.85 ± 5.25         | 38.67 ± 5.30         | ^0.450          | #0.027*         |
|                         | Placebo         | 40.18 ± 4.45         | 40.72 ± 4.58         | ^0.017*         |                 |
|                         | <i>p</i> -value | \$0.295              | \$0.106              |                 |                 |
| Body fat mass (g)       | SKO-001         | 26,575.41 ± 4,506.95 | 26,352.65 ± 4,500.42 | ^0.271          | \$0.019*        |
|                         | Placebo         | 27,669.45 ± 3,746.11 | 28,061.85 ± 4,049.47 | †0.050          |                 |
|                         | <i>p</i> -value | #0.272               | #0.099               |                 |                 |
| TG (mg/dL)              | SKO-001         | 112.49 ± 39.77       | 126.24 ± 64.56       | ^0.092          | \$0.043*        |
|                         | Placebo         | 119.15 ± 60.40       | 104.70 ± 36.02       | †0.097          |                 |
|                         | <i>p</i> -value | \$0.995              | \$0.311              |                 |                 |
| Adiponectin (ng/mL)     | SKO-001         | 10,315.11 ± 5,407.45 | 10,705.14 ± 6,133.35 | †0.808          | \$0.048*        |
|                         | Placebo         | 10,776.39 ± 5,476.20 | 10,123.74 ± 5,656.39 | ^0.102          |                 |
|                         | <i>p</i> -value | \$0.657              | \$0.726              |                 |                 |

SKO-001: *Lactiplantibacillus plantarum* SKO-001-based interventional formulation; TG, triglycerides.

#: Independent-samples *t*-test

\$: Wilcoxon rank sum test

^: Paired *t*-test

†: Wilcoxon signed-rank test

Number of participants in each group: SKO 37, Placebo 33



**Table S8.** Stratification analysis of participants with physical activity of <3,000 METs/w (based on the average of visits 2 and 5)

| Components              | Treatment       | Baseline             | 12 weeks             | <i>p</i> -value | <i>p</i> -value |
|-------------------------|-----------------|----------------------|----------------------|-----------------|-----------------|
| Body fat percentage (%) | SKO-001         | 39.12 ± 5.38         | 38.94 ± 5.43         | ^0.477          | <b>#0.026*</b>  |
|                         | Placebo         | 40.67 ± 3.92         | 41.23 ± 4.10         | ^0.018*         |                 |
|                         | <i>p</i> -value | \$0.199              | \$0.065              |                 |                 |
| Body fat mass (g)       | SKO-001         | 26,726.35 ± 4,437.41 | 26,554.11 ± 4,409.98 | ^0.398          | <b>\$0.039*</b> |
|                         | Placebo         | 27,527.77 ± 3,596.41 | 27,867.74 ± 3,976.36 | †0.090          |                 |
|                         | <i>p</i> -value | #0.402               | #0.188               |                 |                 |
| TG (mg/dL)              | SKO-001         | 116.32 ± 38.32       | 128.22 ± 63.86       | ^0.261          | <b>\$0.016*</b> |
|                         | Placebo         | 122.00 ± 59.55       | 102.74 ± 36.65       | †0.005*         |                 |
|                         | <i>p</i> -value | \$0.933              | \$0.121              |                 |                 |

SKO-001: *Lactiplantibacillus plantarum* SKO-001-based interventional formulation; TG, triglycerides.

\**p* < 0.05

#: Independent-samples *t*-test

\$: Wilcoxon rank sum test

^: Paired *t*-test

†: Wilcoxon signed-rank test

Number of each group subject: SKO 37, Placebo 35

**Table S9.** Adverse events (safety set)

|                                   | <b>SKO<br/>(n = 50)</b> | <b>Placebo<br/>(n = 50)</b> | <b>Total</b> |
|-----------------------------------|-------------------------|-----------------------------|--------------|
| Total adverse event cases         | 46                      | 46                          | 92           |
| At least one adverse event, n (%) | 27 (54.0)               | 28 (56.0)                   | 55 (55.0)    |
| Serious adverse event, n (%)      | 0 (0.0)                 | 1 (2.0)                     | 1 (1.0)      |
| Type of serious adverse event     |                         |                             |              |
| - death                           | 0                       | 0                           | 0            |
| - hospitalisation                 | 0                       | 1                           | 1            |
| - extended hospitalisation        | 0                       | 0                           | 0            |
| - life-threatening event          | 0                       | 0                           | 0            |

SKO: *Lactiplantibacillus plantarum* SKO-001-based interventional formulation

Table S10. Haematology (safety set)

| Parameter                              | Treatment | Baseline           | 12 weeks           | <i>p</i> -value | <i>p</i> -value |
|----------------------------------------|-----------|--------------------|--------------------|-----------------|-----------------|
| WBC ( $\times 10^3/\mu\text{L}$ )      | SKO-001   | 6.15 $\pm$ 1.82    | 5.78 $\pm$ 1.52    | 0.040*          | #0.124          |
|                                        | Placebo   | 5.93 $\pm$ 1.71    | 5.87 $\pm$ 1.39    | 0.910           |                 |
|                                        | p-value   | \$.581             | \$.516             |                 |                 |
| RBC ( $\times 10^6/\mu\text{L}$ )      | SKO-001   | 4.90 $\pm$ 0.35    | 4.80 $\pm$ 0.35    | 0.000***        | #0.461          |
|                                        | Placebo   | 4.87 $\pm$ 0.38    | 4.81 $\pm$ 0.39    | 0.081           |                 |
|                                        | p-value   | \$.735             | \$.729             |                 |                 |
| Haemoglobin (g/dL)                     | SKO-001   | 14.75 $\pm$ 1.02   | 14.54 $\pm$ 1.10   | ^0.006**        | \$0.865         |
|                                        | Placebo   | 14.12 $\pm$ 1.51   | 13.99 $\pm$ 1.58   | †0.048*         |                 |
|                                        | p-value   | #.016*             | \$.290             |                 |                 |
| Haematocrit (%)                        | SKO-001   | 44.11 $\pm$ 2.88   | 43.35 $\pm$ 2.88   | 0.001           | #0.862          |
|                                        | Placebo   | 42.84 $\pm$ 3.66   | 42.12 $\pm$ 3.86   | 0.027           |                 |
|                                        | p-value   | #.056              | \$.263             |                 |                 |
| Platelet ( $\times 10^3/\mu\text{L}$ ) | SKO-001   | 289.72 $\pm$ 56.38 | 283.06 $\pm$ 55.71 | 0.089           | #0.313          |
|                                        | Placebo   | 314.00 $\pm$ 67.45 | 312.00 $\pm$ 70.76 | 0.956           |                 |
|                                        | p-value   | #.054              | #.028*             |                 |                 |
| Neutrophil (%)                         | SKO-001   | 53.82 $\pm$ 7.93   | 52.71 $\pm$ 8.21   | ^0.248          | \$0.028*        |
|                                        | Placebo   | 55.01 $\pm$ 8.11   | 56.88 $\pm$ 9.31   | †0.070          |                 |
|                                        | p-value   | #.462              | #.021*             |                 |                 |
| Lymphocyte (%)                         | SKO-001   | 35.95 $\pm$ 7.66   | 37.07 $\pm$ 8.00   | ^0.186          | \$0.027*        |
|                                        | Placebo   | 35.20 $\pm$ 7.13   | 33.79 $\pm$ 8.17   | †0.082          |                 |
|                                        | p-value   | #.612              | #.049*             |                 |                 |
| Monocyte (%)                           | SKO-001   | 7.22 $\pm$ 1.75    | 7.45 $\pm$ 1.86    | †0.691          | \$0.449         |
|                                        | Placebo   | 6.88 $\pm$ 1.63    | 6.73 $\pm$ 1.58    | ^0.377          |                 |
|                                        | p-value   | #.321              | \$.091             |                 |                 |
| Eosinophil (%)                         | SKO-001   | 2.38 $\pm$ 1.51    | 2.17 $\pm$ 1.48    | 0.140           | \$0.986         |
|                                        | Placebo   | 2.27 $\pm$ 1.58    | 2.06 $\pm$ 1.53    | 0.123           |                 |

|              |         |             |             |       |         |
|--------------|---------|-------------|-------------|-------|---------|
|              | p-value | \$.764      | \$.576      |       |         |
| Basophil (%) | SKO-001 | 0.61 ± 0.25 | 0.60 ± 0.26 | 0.870 | \$0.126 |
|              | Placebo | 0.64 ± 0.42 | 0.54 ± 0.26 | 0.058 |         |
|              | p-value | \$.414      | #.267       |       |         |

SKO-001: *Lactiplantibacillus plantarum* SKO-001-based interventional formulation; WBC: White blood cell; RBC: Red Blood cell

\* $p < 0.05$ , \*\* $p < 0.01$ ,  $p < 0.001$

#: Independent-samples t-test, \$: Wilcoxon rank sum test, ^: Paired t-test, †: Wilcoxon signed-rank test

Number of each group participants: SKO 50, Placebo 50

Table S11. Blood biochemistry (safety set)

| Parameter               | Treatment | Baseline      | 12 weeks      | <i>p</i> -value | <i>p</i> -value |
|-------------------------|-----------|---------------|---------------|-----------------|-----------------|
| AST (U/L)               | SKO-001   | 25.44 ± 8.28  | 22.92 ± 6.67  | ^0.006**        | \$0.548         |
|                         | Placebo   | 25.12 ± 5.43  | 24.10 ± 10.70 | +0.018*         |                 |
|                         | p-value   | \$.604        | \$.845        |                 |                 |
| ALT (U/L)               | SKO-001   | 23.26 ± 11.24 | 20.71 ± 9.26  | 0.013*          | \$0.401         |
|                         | Placebo   | 22.26 ± 9.27  | 21.45 ± 11.64 | 0.135           |                 |
|                         | p-value   | \$.975        | \$.851        |                 |                 |
| γ-GT (U/L)              | SKO-001   | 32.20 ± 49.39 | 28.65 ± 32.05 | 0.046*          | \$0.184         |
|                         | Placebo   | 23.40 ± 13.42 | 22.37 ± 12.85 | 0.739           |                 |
|                         | p-value   | \$.593        | \$.828        |                 |                 |
| ALP (U/L)               | SKO-001   | 68.28 ± 22.77 | 64.50 ± 17.24 | 0.001           | #0.302          |
|                         | Placebo   | 63.00 ± 14.62 | 59.94 ± 14.92 | 0.027           |                 |
|                         | p-value   | \$.322        | \$.208        |                 |                 |
| Total Bilirubin (mg/dL) | SKO-001   | 0.74 ± 0.24   | 0.80 ± 0.27   | 0.064           | #0.684          |
|                         | Placebo   | 0.67 ± 0.27   | 0.75 ± 0.23   | 0.012*          |                 |
|                         | p-value   | \$.067        | \$.457        |                 |                 |
| BUN (mg/dL)             | SKO-001   | 14.33 ± 3.95  | 14.06 ± 3.56  | ^0.816          | \$0.860         |
|                         | Placebo   | 13.68 ± 3.54  | 13.45 ± 3.08  | +0.889          |                 |
|                         | p-value   | #.386         | #.364         |                 |                 |
| Creatinine (mg/dL)      | SKO-001   | 0.79 ± 0.15   | 0.79 ± 0.15   | 0.550           | #0.121          |
|                         | Placebo   | 0.77 ± 0.15   | 0.79 ± 0.14   | 0.129           |                 |
|                         | p-value   | \$.258        | \$.888        |                 |                 |
| Glucose (mg/dL)         | SKO-001   | 89.20 ± 10.99 | 92.02 ± 10.55 | 0.147           | #0.648          |
|                         | Placebo   | 88.96 ± 10.53 | 90.22 ± 10.20 | 0.355           |                 |
|                         | p-value   | #.911         | #.396         |                 |                 |
| hs-CRP (mg/dL)          | SKO-001   | 1.36 ± 2.15   | 0.89 ± 0.80   | 0.479           | \$0.754         |
|                         | Placebo   | 1.79 ± 2.47   | 1.34 ± 1.98   | 0.240           |                 |

|                   |         |             |             |         |         |
|-------------------|---------|-------------|-------------|---------|---------|
|                   | p-value | \$ .537     | \$ .885     |         |         |
| C-peptide (ng/mL) | SKO-001 | 2.13 ± 1.06 | 1.95 ± 0.93 | 0.060   | \$0.525 |
|                   | Placebo | 1.87 ± 0.50 | 1.81 ± 1.47 | 0.006** |         |
|                   | p-value | \$ .676     | \$ .219     |         |         |

SKO-001: *Lactiplantibacillus plantarum* SKO-001-based interventional formulation; AST: Aspartate aminotransferase; ALT: Alanine aminotransferase;  $\gamma$ -GT: Gamma-glutamyltransferase; ALP: Alkaline phosphatase; BUN: Blood urea nitrogen; hs\_CRP: High-sensitivity C-reactive protein

\* $p < 0.05$ , \*\* $p < 0.01$

#: Independent-samples t-test, \$: Wilcoxon rank sum test, ^: Paired t-test, †: Wilcoxon signed-rank test

SKO-001, n = 50; Placebo, n = 50

Table S12. Urinalysis (safety set)

| Parameter        | Treatment | Baseline    | 12 weeks    | <i>p</i> -value | <i>p</i> -value |
|------------------|-----------|-------------|-------------|-----------------|-----------------|
| pH               | SKO-001   | 5.67 ± 0.79 | 5.66 ± 0.70 | †0.913          | 0.662           |
|                  | Placebo   | 5.79 ± 0.89 | 5.94 ± 0.98 | ^0.366          |                 |
|                  | p-value   | .524        | .265        |                 |                 |
| Specific Gravity | SKO-001   | 1.02 ± 0.01 | 1.02 ± 0.01 | ^0.748          | 0.939           |
|                  | Placebo   | 1.02 ± 0.01 | 1.02 ± 0.01 | †0.918          |                 |
|                  | p-value   | .787        | .767        |                 |                 |

SKO-001: *Lactiplantibacillus plantarum* SKO-001-based interventional formulation; pH: Hydrogen ion concentration index

SKO-100, n = 50; Placebo, n = 50

: Wilcoxon's rank sum test

^ : Paired t test

† : Wilcoxon's signed rank test

Table S13. urinalysis about Comparing Protein, Glucose, WBC, and RBC in **Normal/Abnormal** categorical format

| Parameter | Treatment | Baseline<br>(Normal/Abnormal) | 12 weeks<br>(Normal/Abnormal) |
|-----------|-----------|-------------------------------|-------------------------------|
| Protein   | SKO-001   | 45/5                          | 39/9                          |
|           | Placebo   | 44/6                          | 42/7                          |
|           | p-value   | ‡1.000                        | ‡0.750                        |
| Glucose   | SKO-001   | 50/0                          | 48/0                          |
|           | Placebo   | 50/0                          | 49/0                          |
|           | p-value   | &1.000                        | &1.000                        |
| WBC       | SKO-001   | 47/3                          | 47/1                          |
|           | Placebo   | 48/2                          | 47/2                          |
|           | p-value   | &1.000                        | &1.000                        |
| RBC       | SKO-001   | 28/22                         | 32/16                         |
|           | Placebo   | 27/23                         | 31/18                         |
|           | p-value   | ‡1.000                        | ‡0.890                        |

SKO-001: *Lactiplantibacillus plantarum* SKO-001-based interventional formulation; WBC: White blood cell; RBC: Red Blood cell

‡: Chi-square test , &: Fisher's exact test

SKO-100, n = 50; Placebo, n = 50



Table S14. Vital sign (safety set)

| Parameter            | Treatment | Baseline      | 12 weeks       | p-value | p-value |
|----------------------|-----------|---------------|----------------|---------|---------|
| BP (systolic; mmHg)  | SKO-001   | 127.76 ± 9.77 | 127.76 ± 8.97  | 0.918   | #0.958  |
|                      | Placebo   | 126.28 ± 9.08 | 126.41 ± 11.53 | 0.865   |         |
|                      | p-value   | \$.366        | \$.667         |         |         |
| BP (diastolic; mmHg) | SKO-001   | 77.78 ± 8.63  | 78.76 ± 7.89   | 0.312   | \$0.143 |
|                      | Placebo   | 78.36 ± 7.63  | 77.55 ± 8.26   | 0.173   |         |
|                      | p-value   | \$.775        | #.462          |         |         |
| Pulse (bpm)          | SKO-001   | 77.90 ± 8.32  | 75.35 ± 9.00   | 0.052   | #0.615  |
|                      | Placebo   | 78.18 ± 7.88  | 76.43 ± 8.40   | 0.134   |         |
|                      | p-value   | #.863         | #.540          |         |         |
| BT (°C)              | SKO-001   | 36.52 ± 0.17  | 36.51 ± 0.21   | 0.194   | #0.561  |
|                      | Placebo   | 36.57 ± 0.24  | 36.52 ± 0.22   | 0.719   |         |
|                      | p-value   | \$.431        | \$.223         |         |         |

SKO-001: *Lactiplantibacillus plantarum* SKO-001-based interventional formulation; BP: Blood Pressure; BT: Body Temperature

#: Independent-samples t-test \$: Wilcoxon rank sum test ^: Paired t-test †: Wilcoxon signed-rank test

SKO-100, n = 50; Placebo, n = 50

### Total Enrollment Status

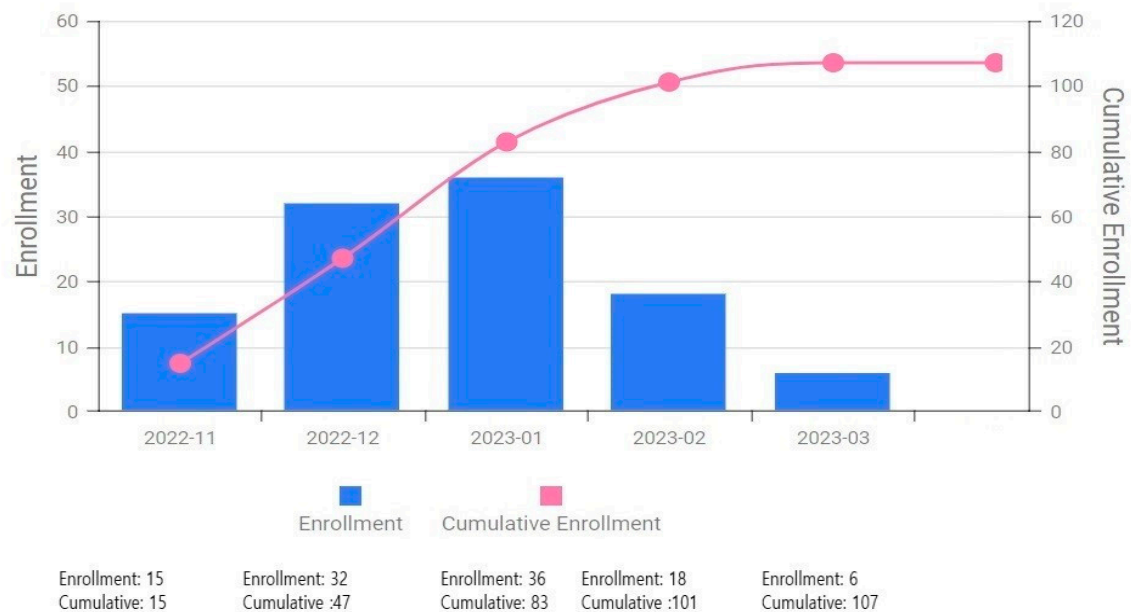

**Figure S1. Total enrollment status**

**Table S15. Seasonal distribution of enrolments**

| Group   | Fall  | Winter  | Spring | Total    |
|---------|-------|---------|--------|----------|
| SKO-001 | 4(8%) | 43(86%) | 3(6%)  | 50(100%) |
| placebo | 2(4%) | 45(90%) | 3(6%)  | 50(100%) |

Data are presented as N and %. Abbreviations : SKO-001: Lactiplantibacillus plantarum SKO-001-based interventional formulation.

**Table S16.** Abbreviations and glossary of terms

|              |                                                |
|--------------|------------------------------------------------|
| ALP          | Alkaline phosphatase                           |
| ALT          | Alanine aminotransferase                       |
| ANCOVA       | Analysis of covariance                         |
| AST          | Aspartate aminotransferase                     |
| BP           | Blood Pressure                                 |
| BT           | Body Temperature                               |
| BUN          | Blood urea nitrogen                            |
| SKO-001      | Lactiplantibacillus plantarum SKO-001          |
| CFU          | Colony-forming units                           |
| CRP          | C-reactive protein                             |
| CT           | Computed tomography                            |
| DEXA         | Dual-energy X-ray absorptiometry               |
| GPAQ         | Global Physical Activity Questionnaire         |
| $\gamma$ -GT | Gamma-glutamyltransferase                      |
| HDL-C        | High-density lipoprotein-cholesterol           |
| HFD          | High-fat diet                                  |
| HFHF         | High-fat, high-fructose                        |
| Hs-CRP       | High-sensitivity C-reactive protein            |
| IPAQ         | International Physical Activity Questionnaires |
| IRB          | Institutional review board                     |
| LDL-C        | Low-density lipoprotein-cholesterol            |
| MET          | Metabolic equivalent of task                   |
| NAFLD        | Non-alcoholic fatty liver disease              |
| pH           | Hydrogen ion concentration index               |
| RBC          | Red blood cell                                 |

---

|     |                                               |
|-----|-----------------------------------------------|
| SAE | Serious adverse event                         |
| SAS | Safety analysis set                           |
| TG  | Triglyceride                                  |
| VSR | Visceral fat area/subcutaneous fat area ratio |
| WBC | White blood cell                              |
| WHR | Waist/hip ratio                               |

---

## Advertisements\_in\_English

### Recruiting human subjects for a dietary supplement for body fat reduction

**A 12-week, Single-Center, Randomized, Double-Blind, Placebo-Controlled, Parallel-Design Human Application Study to Evaluate the Efficacy and Safety of *Lactobacillus plantarum* SKO-001 in Body Fat Reduction.**

#### ■ Human application study objectives

This study was designed to evaluate the efficacy and safety of *Lactiplantibacillus plantarum* SKO-001 by observing changes in body fat-related markers when adult male and female subjects consumed the test food (*Lactiplantibacillus plantarum* SKO-001) or control food for 12 weeks. This study aimed to evaluate the efficacy and safety of *Lactiflavacillus plantarum* SKO-001.

#### ■ Human Application Test Methods

Participants will be randomized in a 1:1 ratio to either the treatment or control group.

The duration of participation was 12–14 weeks, with a total of 5–6 visits (additional visits may be scheduled depending on the subject's condition).

Vital signs, physical measurements, blood tests, urinalysis, diet, physical activity, and lifestyle questionnaires were administered at each visit.

#### ■ Who can participate

Adult men and women 19 years of age or older and under 65 years of age

Body mass index of more than 25.0 kg/m<sup>2</sup> and less than 30.0 kg/m<sup>2</sup>

Voluntarily decide to participate in this human clinical trial and sign an informed consent form

■ Benefits to Participants and Possible Risks and Discomforts

All participants in this study will be paid for transportation (participation fee).

No known side effects were anticipated in either the treatment or control group; however, unexpected side effects may occur.

You may also experience inconveniences from dual-energy X-ray absorptiometry (DEXA), computed tomography (CT), and blood tests.

■ How to get involved and call us

If you would like more information about the possible side effects and study methods or would like to apply for this study, please contact the clinical researcher at the Department of Oriental Medicine, Jecheon Oriental Hospital, Seymyeong University at 043-649-1868.

■ Human Application Test Institution and Person in Charge

Seymung University Jecheon Korean Medicine Hospital (66, Seymyeong-ro, Jecheon-si, Chungcheongbuk-do) Prof. Shin, Shin-Mi (043-649-1873)

■ Sponsor

Kolmar BnH (61, Hunneung-ro 8-gil, Seocho-gu, Seoul, Korea, 02-3459-5822)
